# Supplementary material for: Differential Activities of Antioxidant Enzymes, Superoxide Dismutase, Peroxidase, and Catalase vis-à-vis Phosphine Resistance in Field Populations of Lesser Grain Borer (Rhyzopertha dominica) from India
Source: MDPI journal article supplement (doi:10.3390/antiox12020270), 2023-01-25
Supplement: s1 [file s1]

## Supplementary Materials

**Table S1.** Parameters from the Biplot (Principal Component Analysis) *viz.*, Eigenvalue, Cumulative Eigenvalue, % Variance, and Cumulative variance.

| PC | Eigenvalue | % Variance | Cumulative Eigenvalue | Cumulative Variance |
|----|------------|------------|-----------------------|---------------------|
| 1  | 2.45       | 61.37      | 2.45                  | 61.37               |
| 2  | 0.82       | 20.42      | 3.27                  | 81.79               |
| 3  | 0.39       | 9.69       | 3.66                  | 91.48               |
| 4  | 0.34       | 8.52       | 4.00                  | 100.00              |

This table briefs on the factors and their respective Eigenvalue and % cumulative variance chosen for the Principal Component Analysis (PCA). Respective % variance and Cumulative Eigenvalues are also shown in the table. Here, PC1 and PC2 were considered for our PCA analysis.
